# Supplementary material
Source: PubMed Central journal article supplement (PMC5805032)
Supplement: tpmd170067.SD1.pdf [file tpmd170067.SD1.pdf]

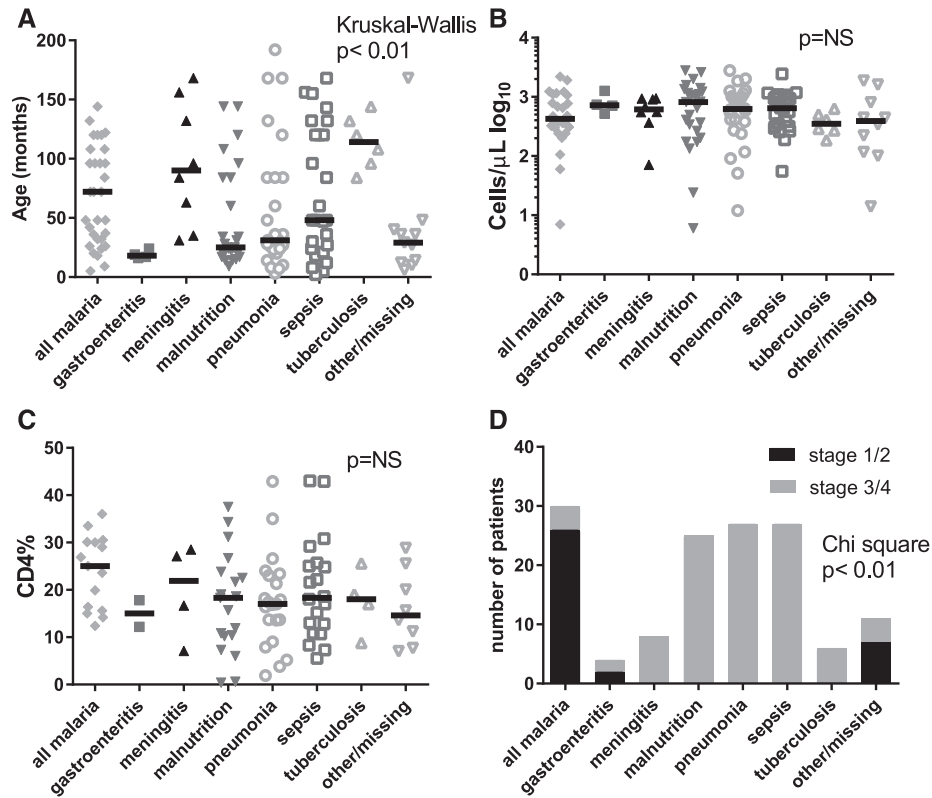

SUPPLEMENTAL FIGURE 1. Age distribution (**A**), CD4+ T-lymphocyte absolute and percent (**B, C**), and HIV clinical stage (**D**) by discharge diagnosis for children with detectable HIV DNA or RNA PCR only. Horizontal bars denote median values. (**A**) Age differed between groups ( $P < 0.01$ , Kruskal-Wallis test). Children with tuberculosis were significantly older than children with gastroenteritis (multiplicity adjusted  $P < 0.04$ ). (**B**) CD4 count did not differ between groups ( $P = 0.531$ , Kruskal-Wallis test). Note: scale of y axis is log<sub>10</sub>. (**C**) CD4% did not differ between groups ( $P = 0.50$ , Kruskal-Wallis test). (**D**) HIV clinical stage differed based on discharge diagnosis (Chi-square,  $P < 0.01$ ). Nearly all children with malnutrition, pneumonia, meningitis, tuberculosis and sepsis had advanced clinical HIV disease severity (stage 3 or 4), whereas 79.7% of children with malaria had mild or asymptomatic clinical HIV disease (stage 1 or 2).

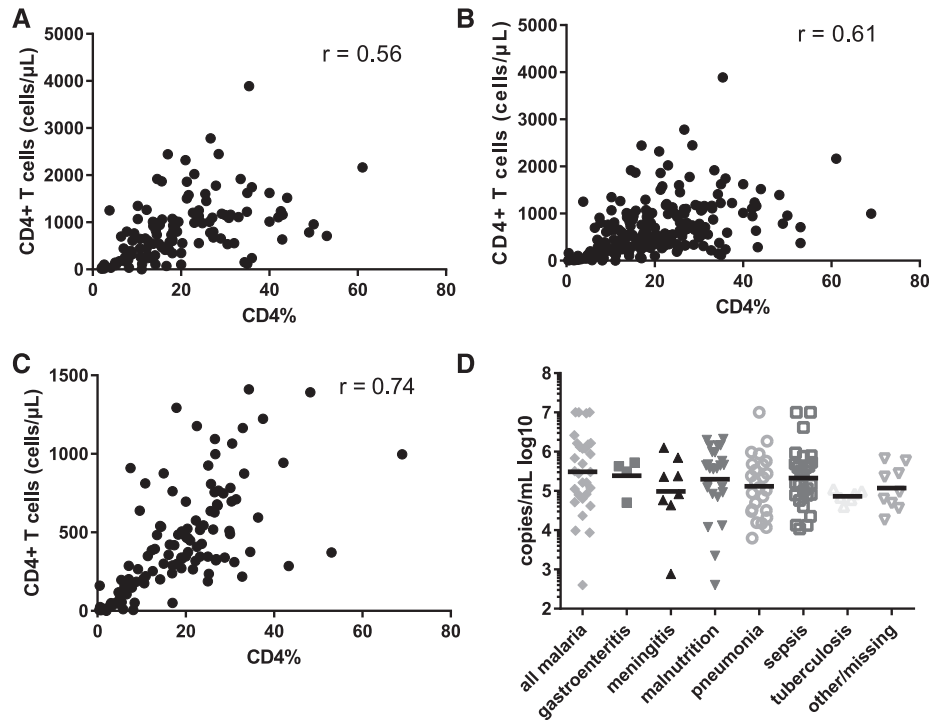

SUPPLEMENTAL FIGURE 2. Correlation between absolute CD4+ T lymphocyte count and CD4+ T lymphocyte percentage (A–C), and HIV viral load based on discharge diagnosis (D). (A) Correlation of CD4 count with CD4% for all children with available data. CD4 count positively correlated with CD4% ( $r = 0.61$ , 95% CI 0.52–0.68,  $P < 0.01$ ). (B) Correlation of CD4 count with CD4% for children  $N \geq 5$  years old. There was a stronger correlation between CD4 count and CD4% in older children ( $r = 0.74$ , 95% CI 0.64–0.81,  $P < 0.01$ ). (C) Correlation of CD4 count with CD4% for children younger than 5 years old was weaker than in older children ( $r = 0.56$ , 95% CI 0.42–0.67,  $P < 0.01$ ). (D) 150 children had HIV RNA PCR quantification from archived plasma. HIV viral load did not differ based on discharge diagnosis. Note: y axis scale is log<sub>10</sub>; horizontal bars denote geometric mean.
